# Supplementary material for: HOXB9 enhances the ability of lung cancer cells to penetrate the blood-brain barrier
Source: Aging (Albany NY). 2020 Dec 19;13(4):4999–5019. doi: 10.18632/aging.202324 (PMC7950248; doi:10.18632/aging.202324)
Supplement: Supplementary Figures [file aging-13-202324-s001.pdf]

## SUPPLEMENTARY FIGURES

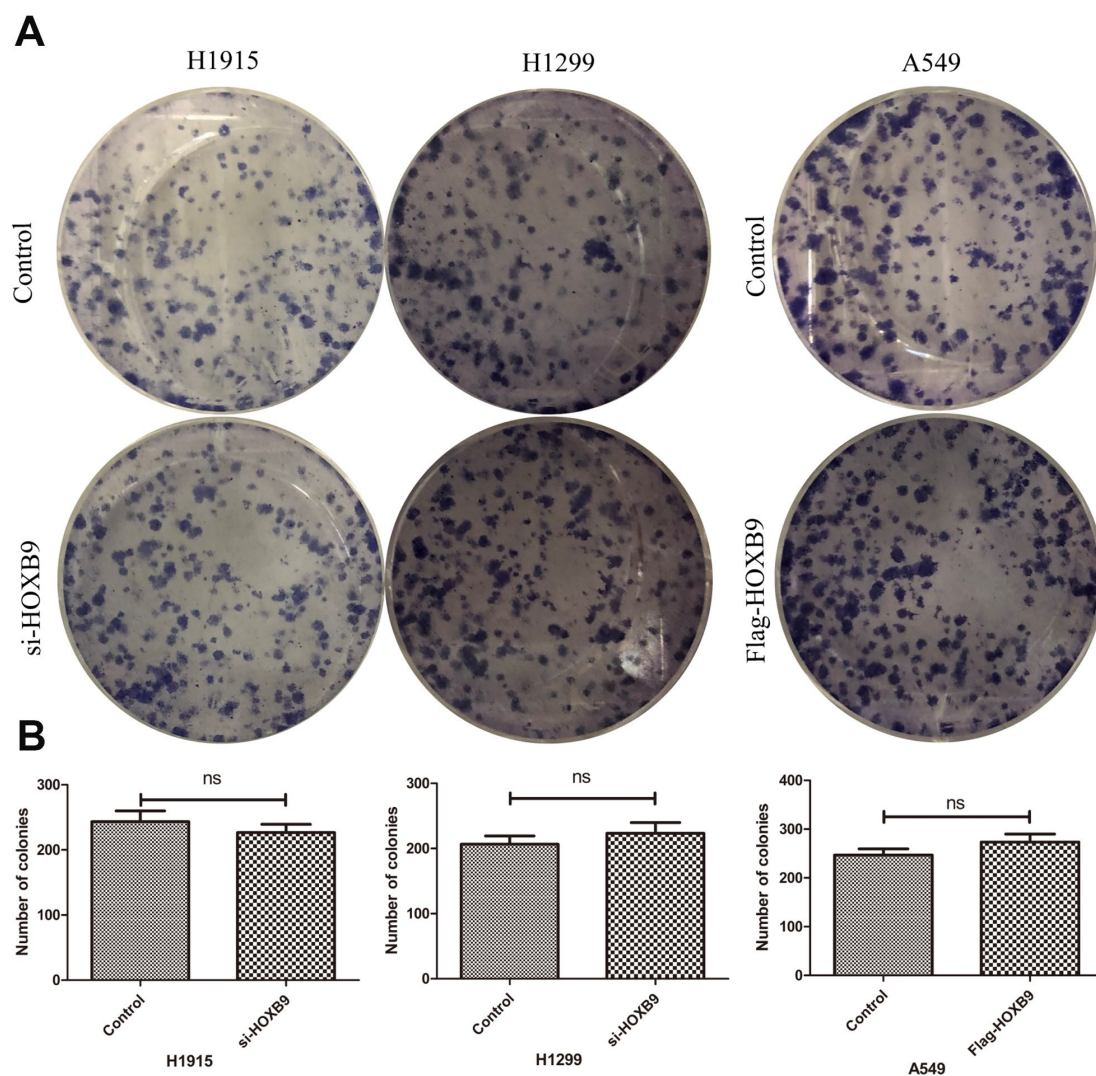

**Supplementary Figure 1. HOXB9 expression does not affect colony formation efficiency in NSCLC cells.** (A) Colony forming efficiency (CFE) assays were conducted to assess the effect of HOXB9 expression on the proliferation of NSCLCs. (B) Quantification of CFE assay data.

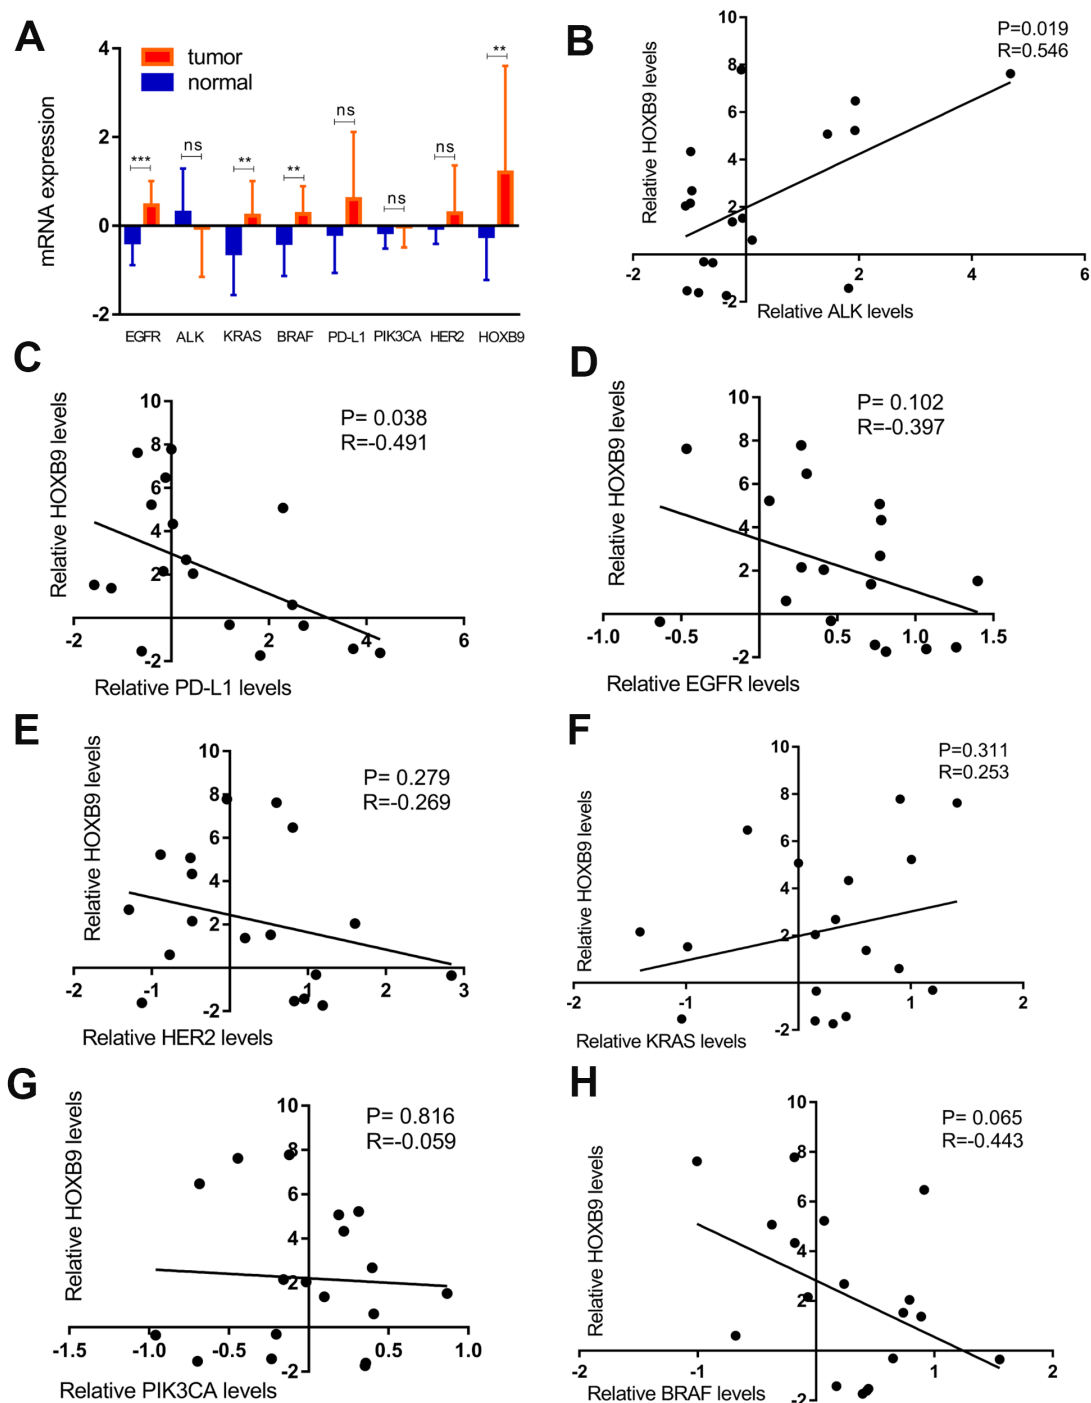

**Supplementary Figure 2. The expression relationship between HOXB9 and common abnormal genes in lung cancer through GEO database (GSE74706).** (A) The expression levels of HOXB9, EGFR, KRAS and BRAF were significantly increased in NSCLC. (B) Correlation analyses revealed a significant positive correlation between the expression levels of ALK and HOXB9. (C) HOXB9 is negatively correlated with PD-L1 expression. (D–H) These pictures show the correlation between HOXB9 and EGFR, HER2, KRAS, PIK3CA, BRAF, but not statistically significant. \*p < 0.05, \*\*p < 0.01, \*\*\*p < 0.001.

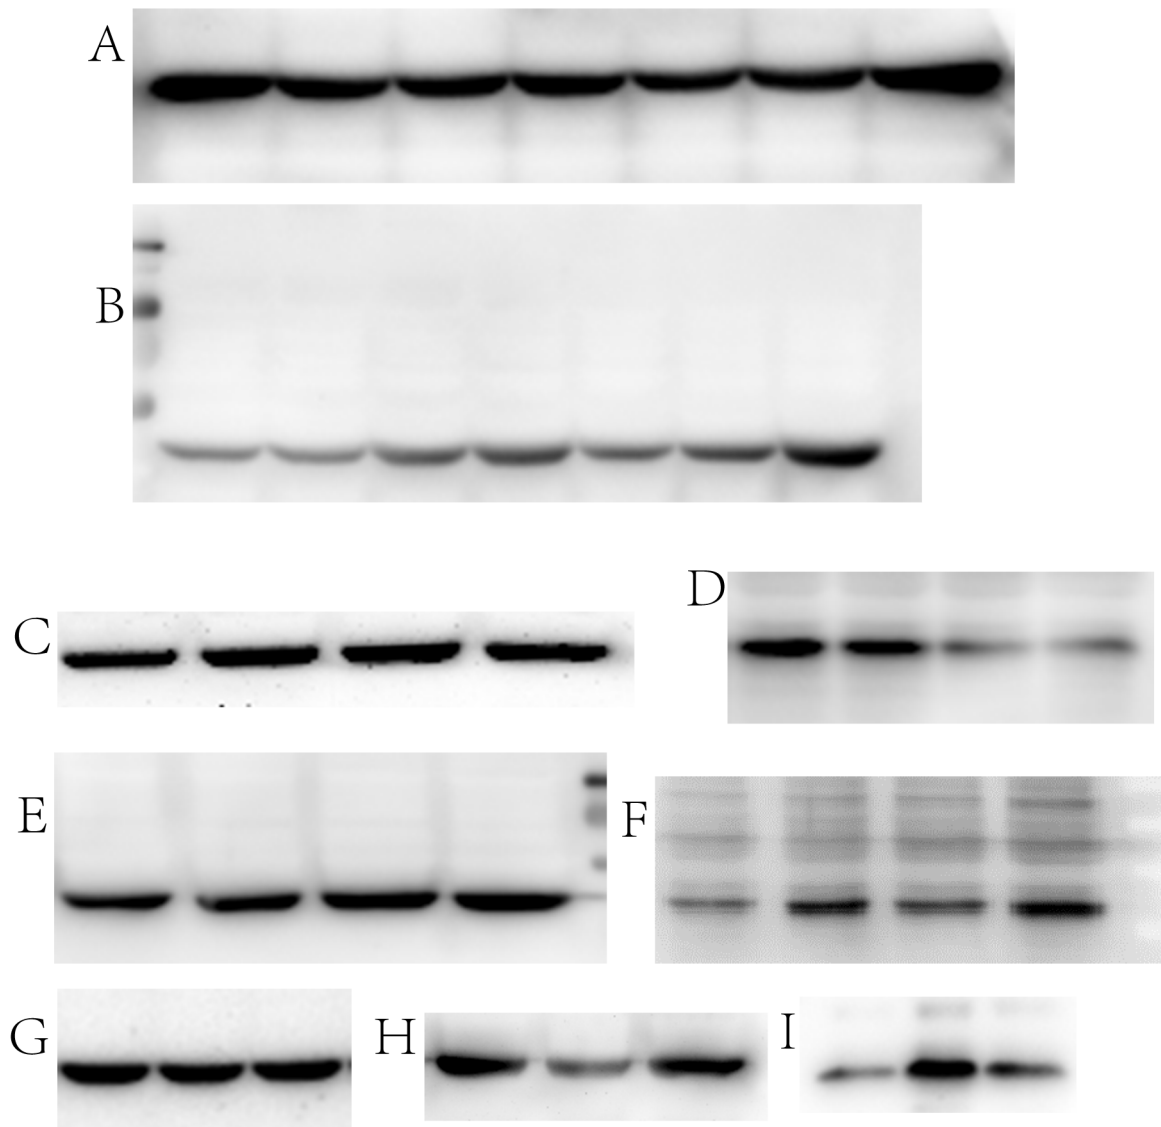

**Supplementary Figure 3. The original data of WB protein expression.** (A, B) The original data of WB protein expression of Figure 1F. (C, D) The original data of WB protein expression of Figure 2A. (E, F) The original data of WB protein expression of Figure 4E. (G–I) The original data of WB protein expression of Figure 5A.

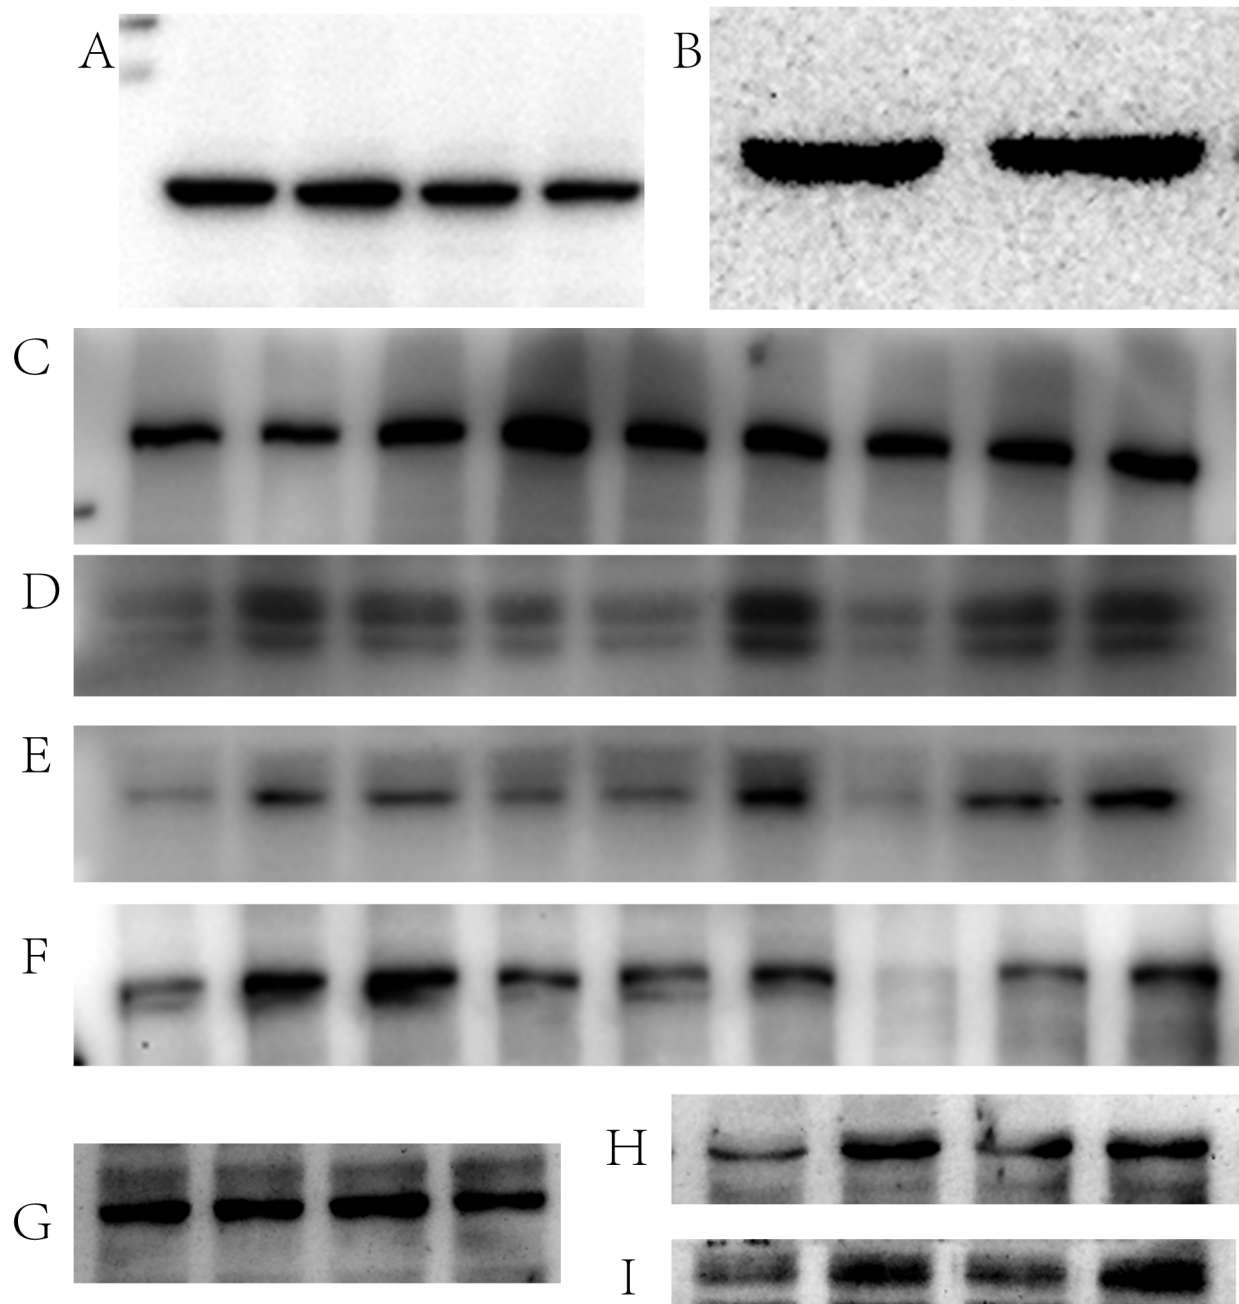

**Supplementary Figure 4. The original data of WB protein expression.** (A) The original data of WB protein expression of Figure 5D. (B) The original data of WB protein expression of Figure 3A. (C–F) The original data of WB protein expression of Figure 6B. (G–I) The original data of WB protein expression of Figure 6D.

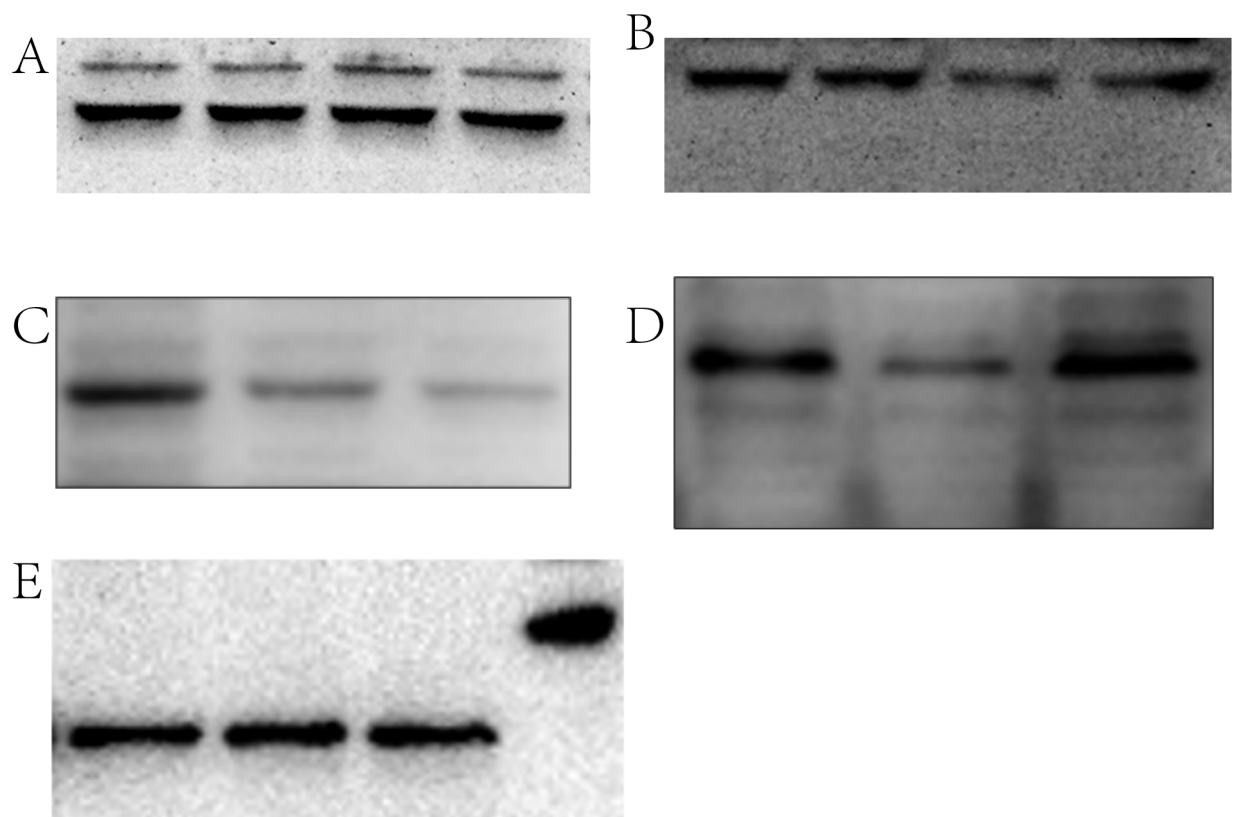

**Supplementary Figure 5. The original data of WB protein expression.** (A, B) The original data of WB protein expression of Figure 6E. (C–E) The original data of WB protein expression of Figure 6G.
